# Supplementary material
Source: PubMed Central journal article supplement (PMC5880750)

## ITA (standard plasma sample, N=114)

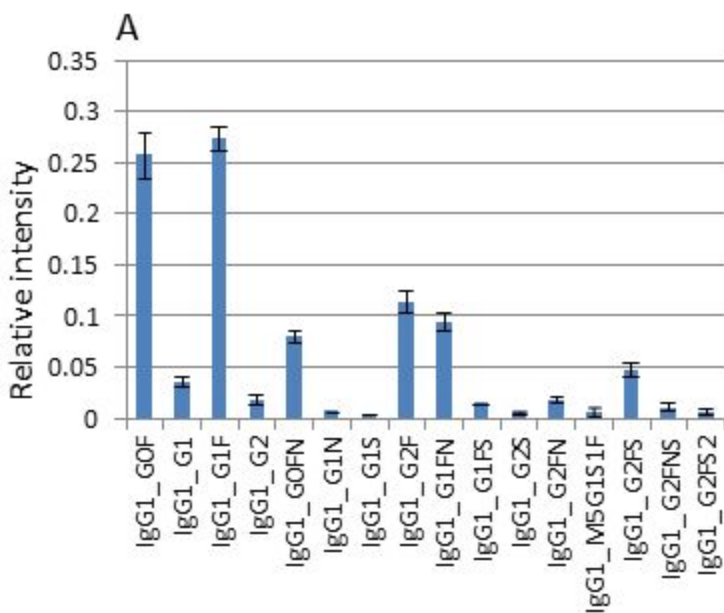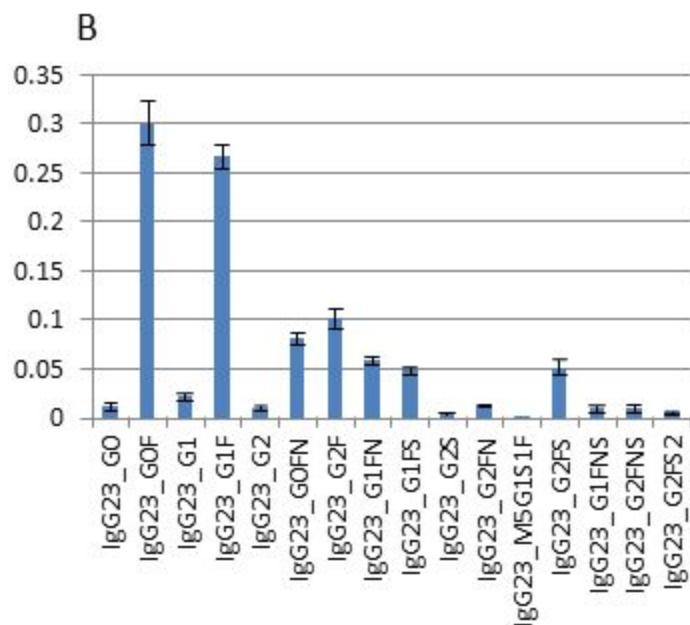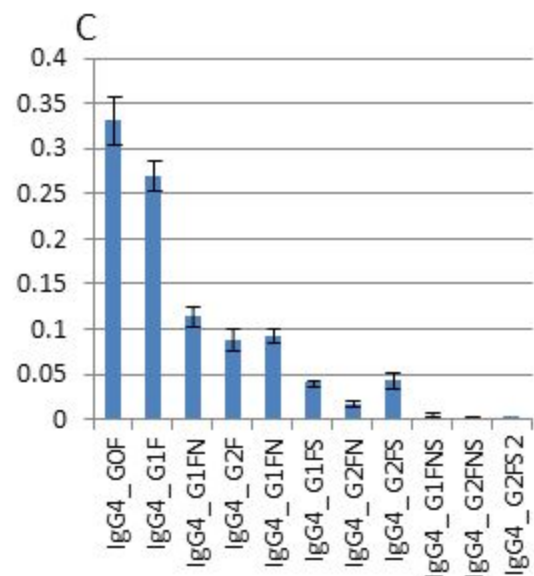

## US (standard plasma sample, N=78)

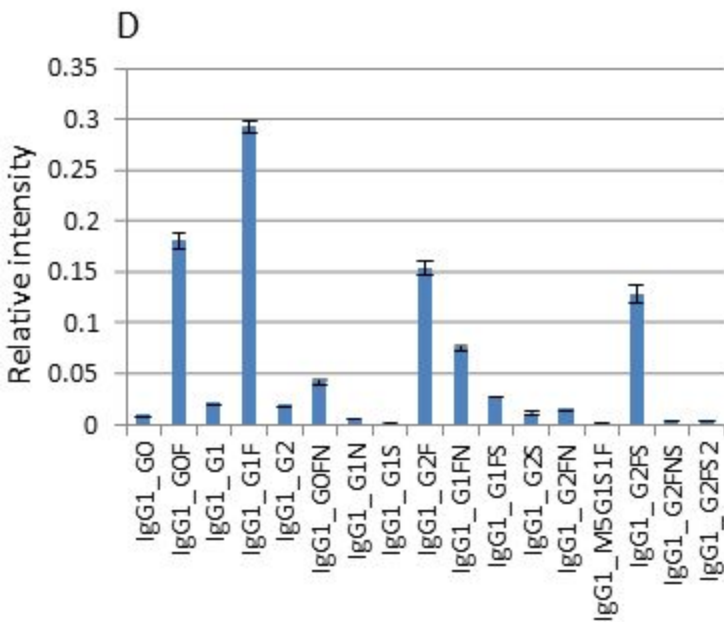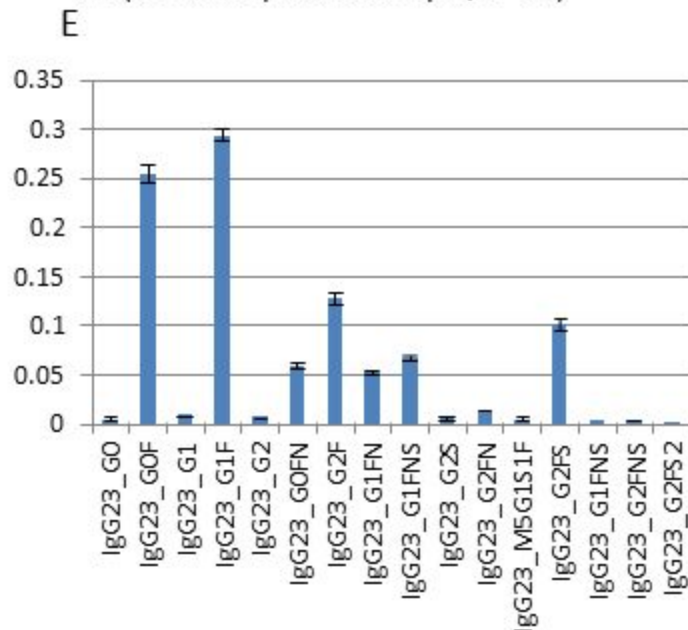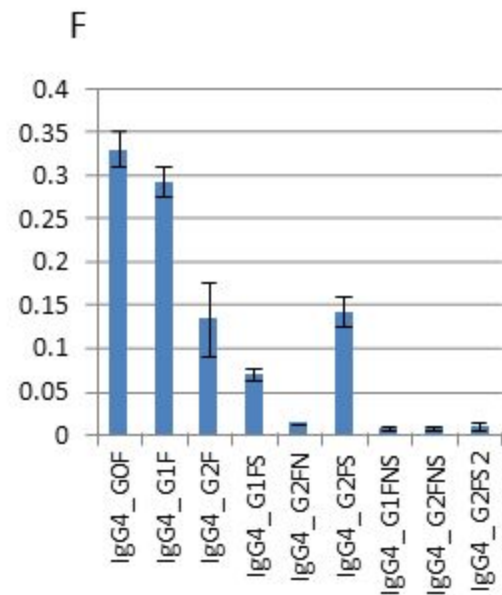

Supplement: NIHMS932728-supplement-2.pdf [file NIHMS932728-supplement-2.pdf]

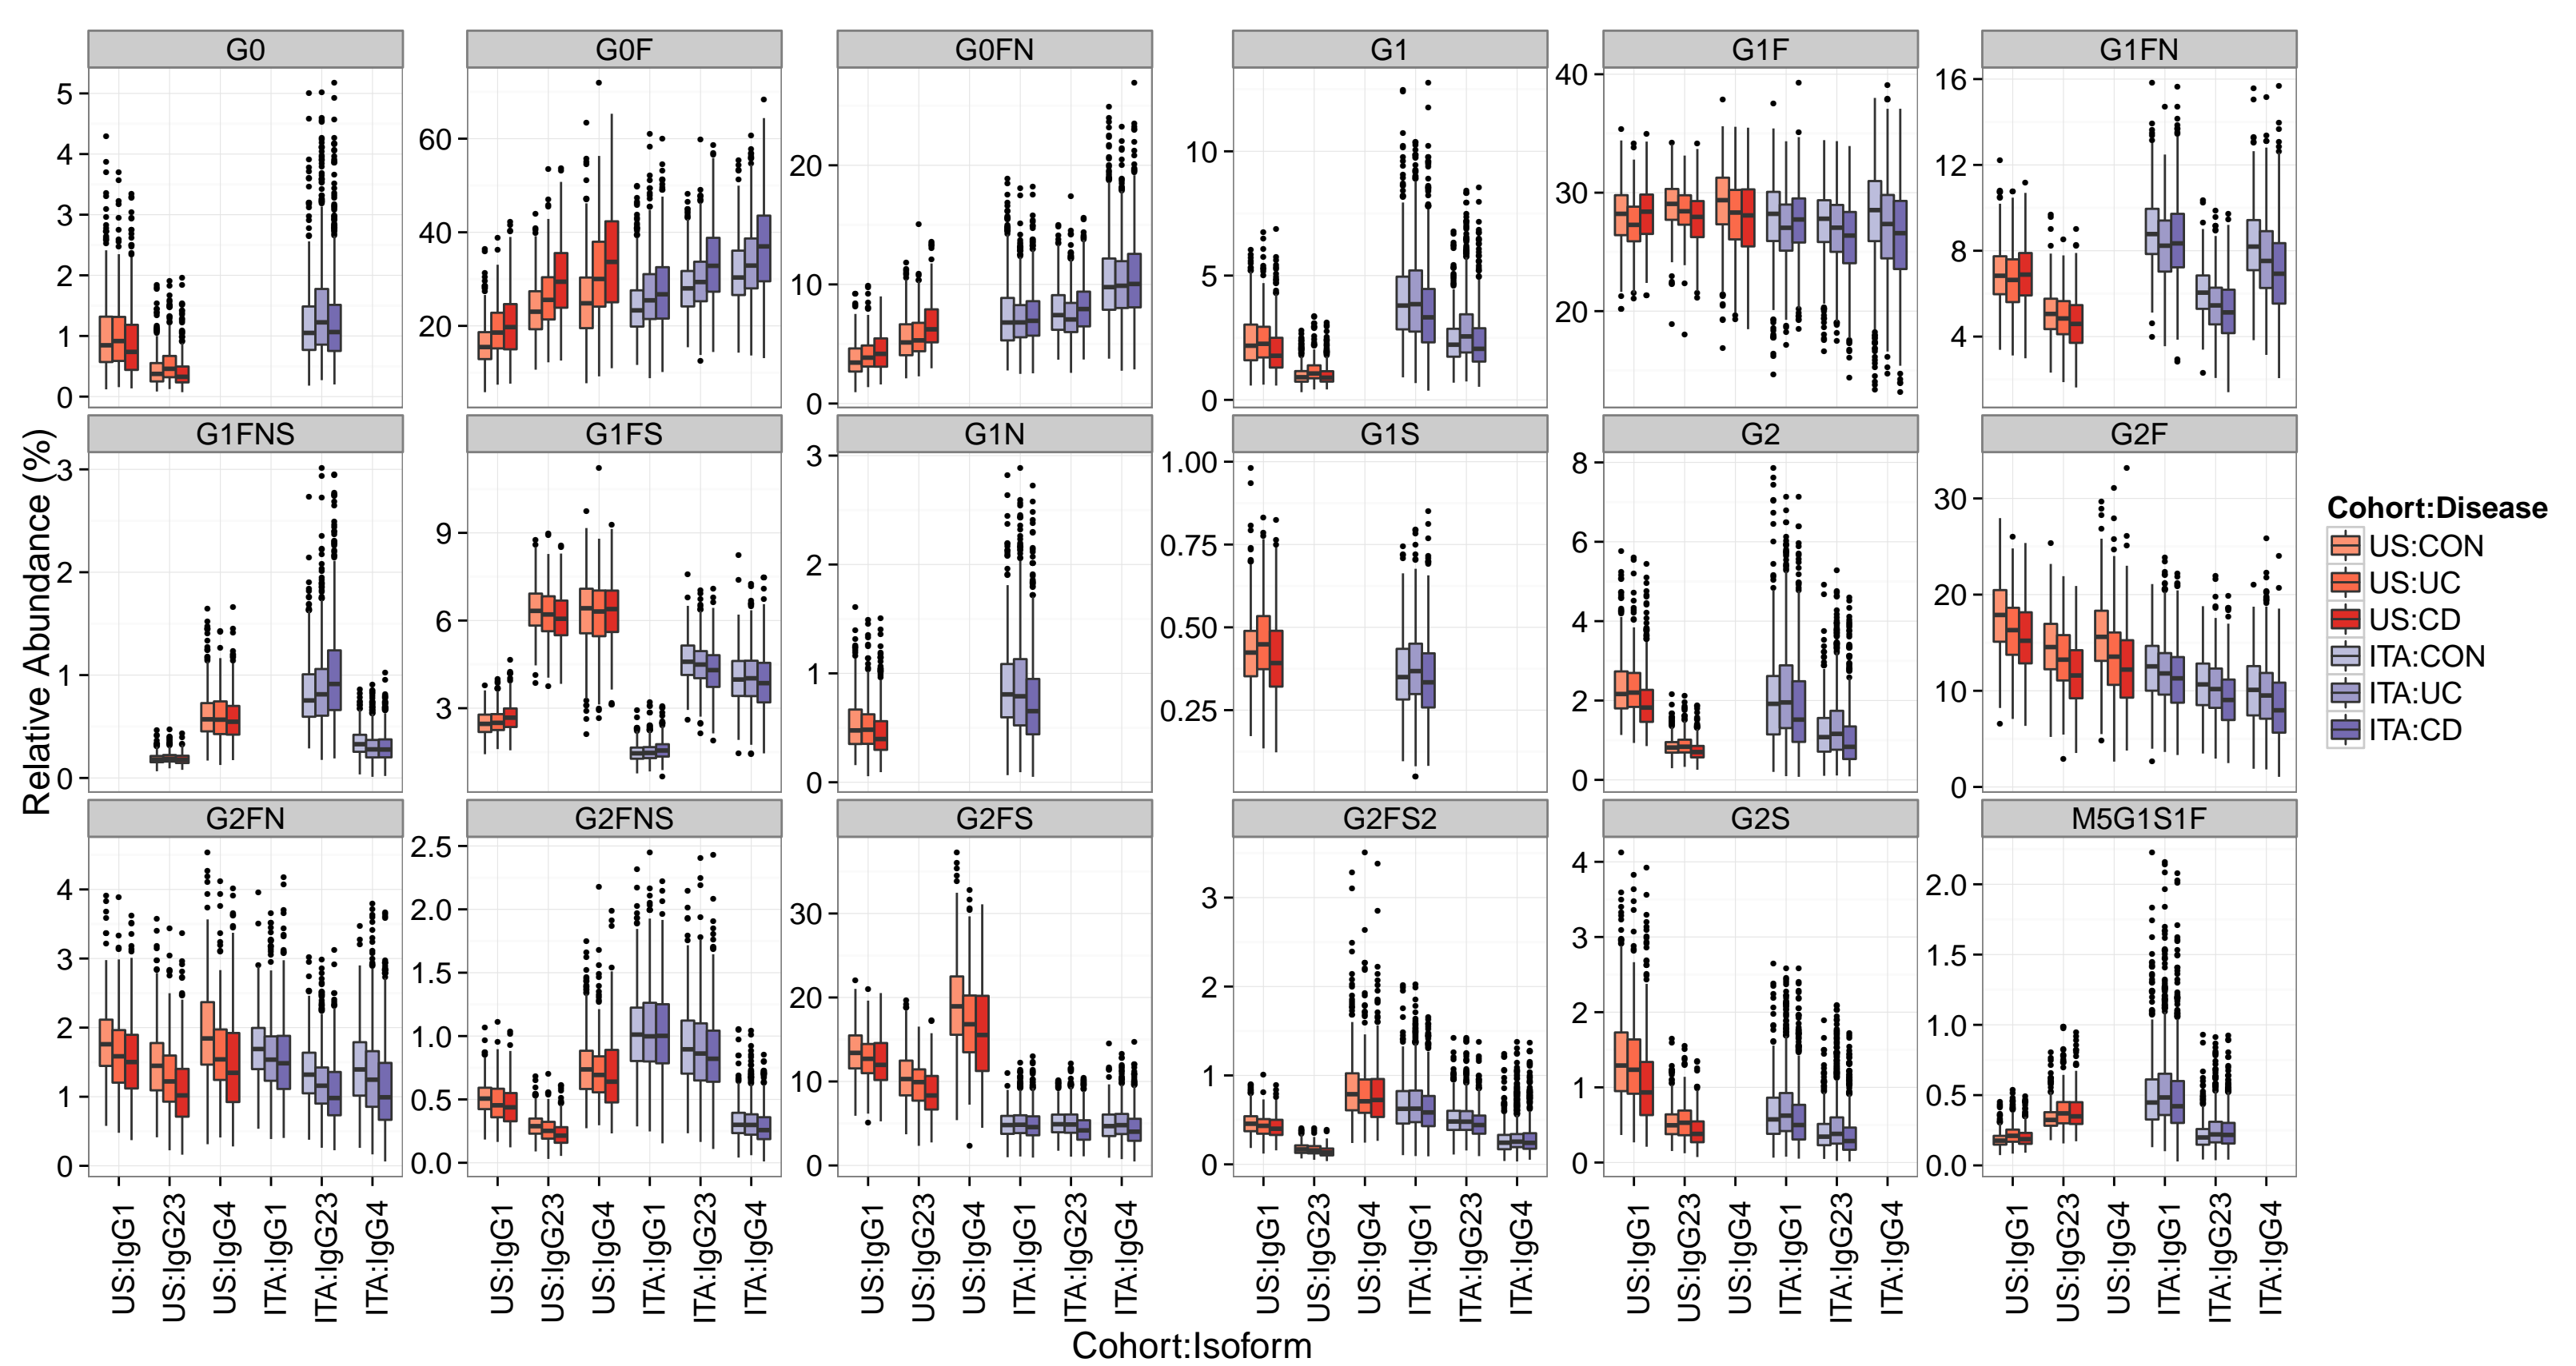

Supplement: NIHMS932728-supplement-3.pdf [file NIHMS932728-supplement-3.pdf]

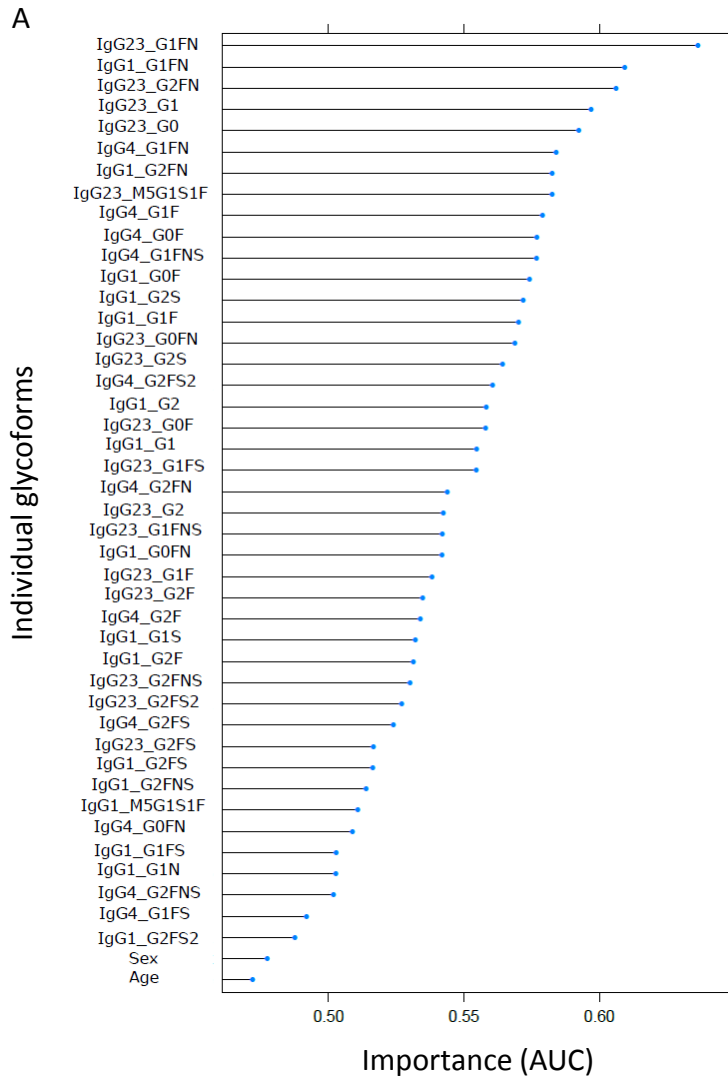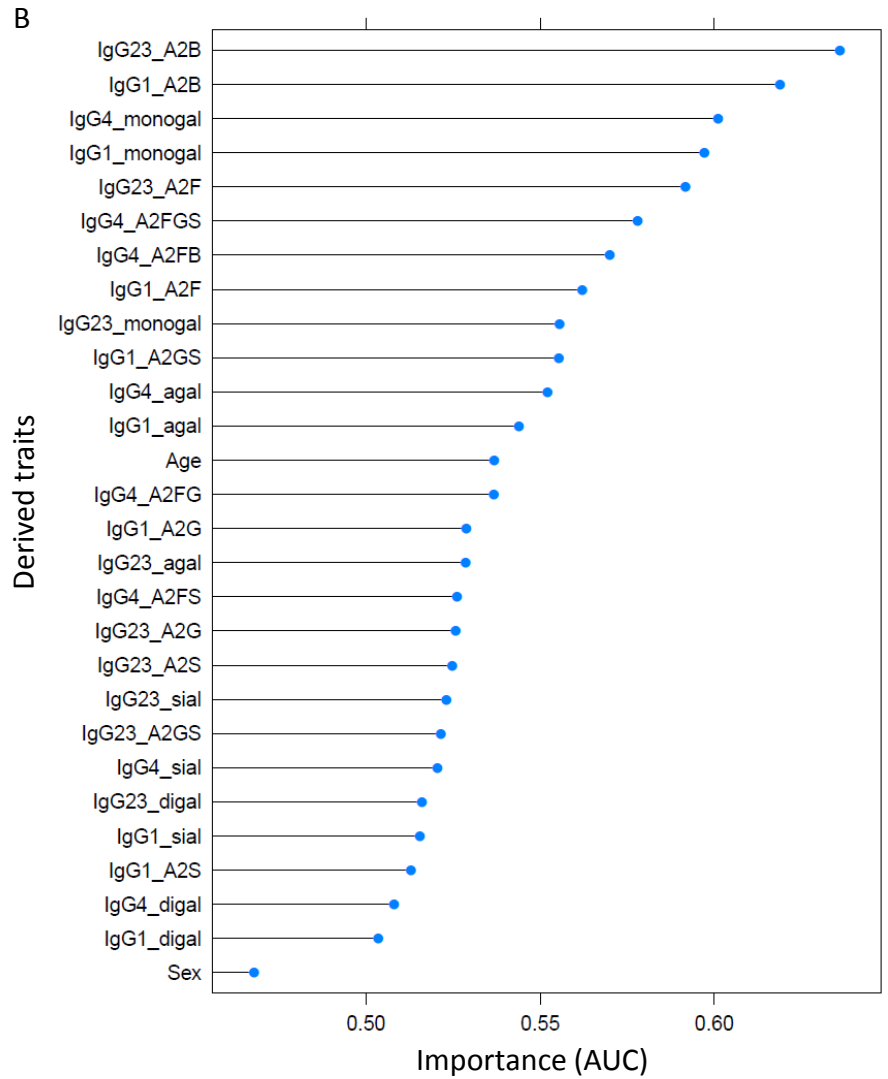

Supplement: NIHMS932728-supplement-4.pdf [file NIHMS932728-supplement-4.pdf]

A

Individual glycoforms

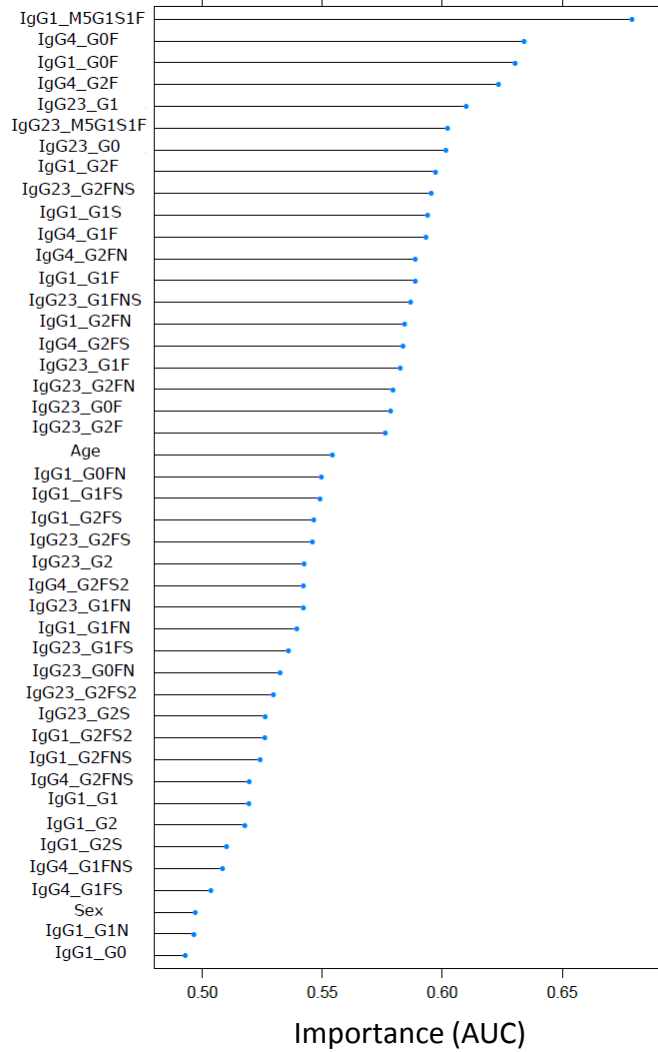

B

Derived traits

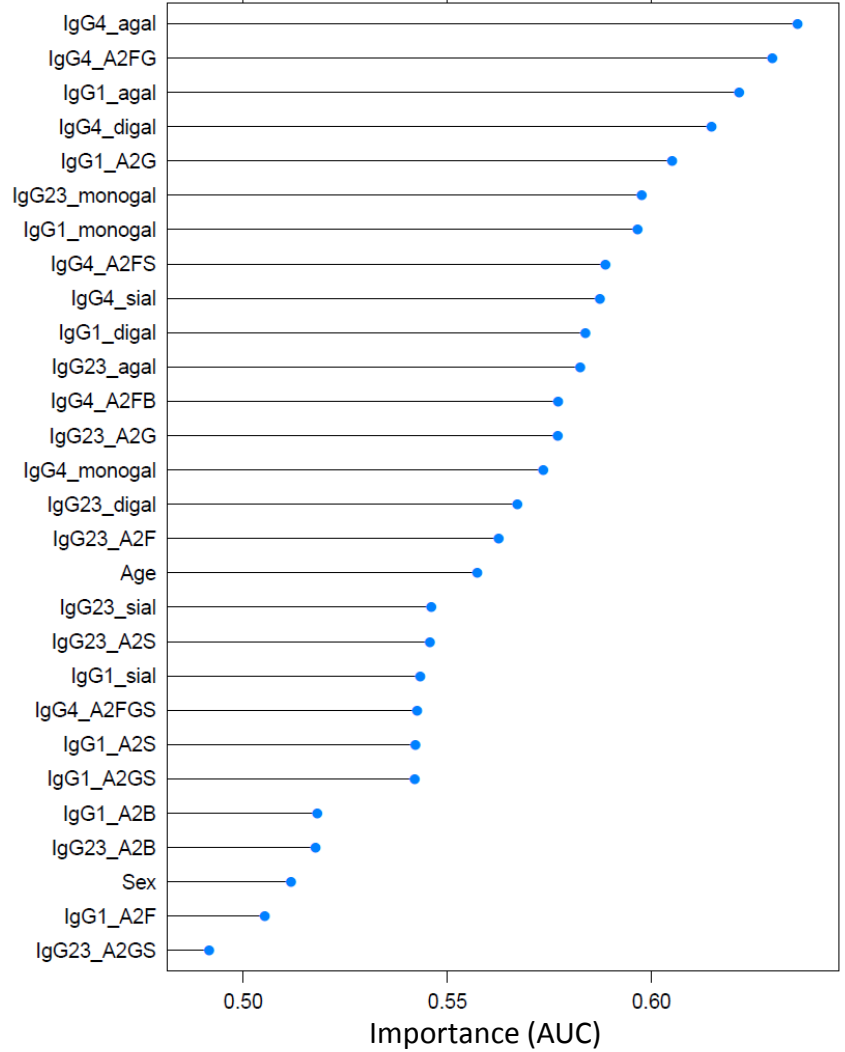

Supplement: NIHMS932728-supplement-5.pdf [file NIHMS932728-supplement-5.pdf]

A

Individual glycoforms

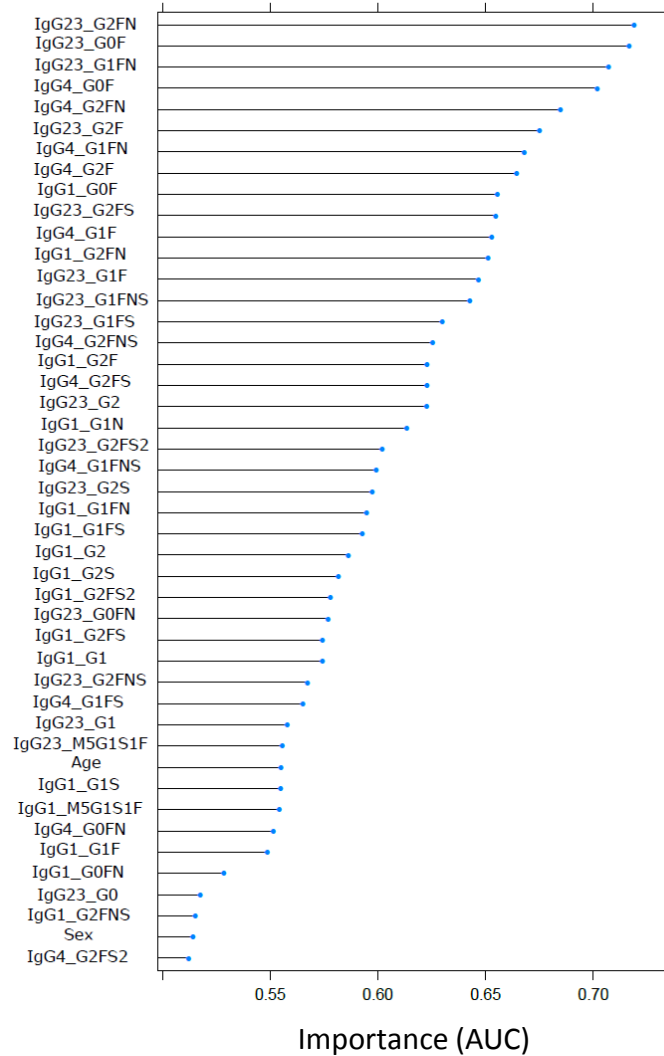

B

Derived traits

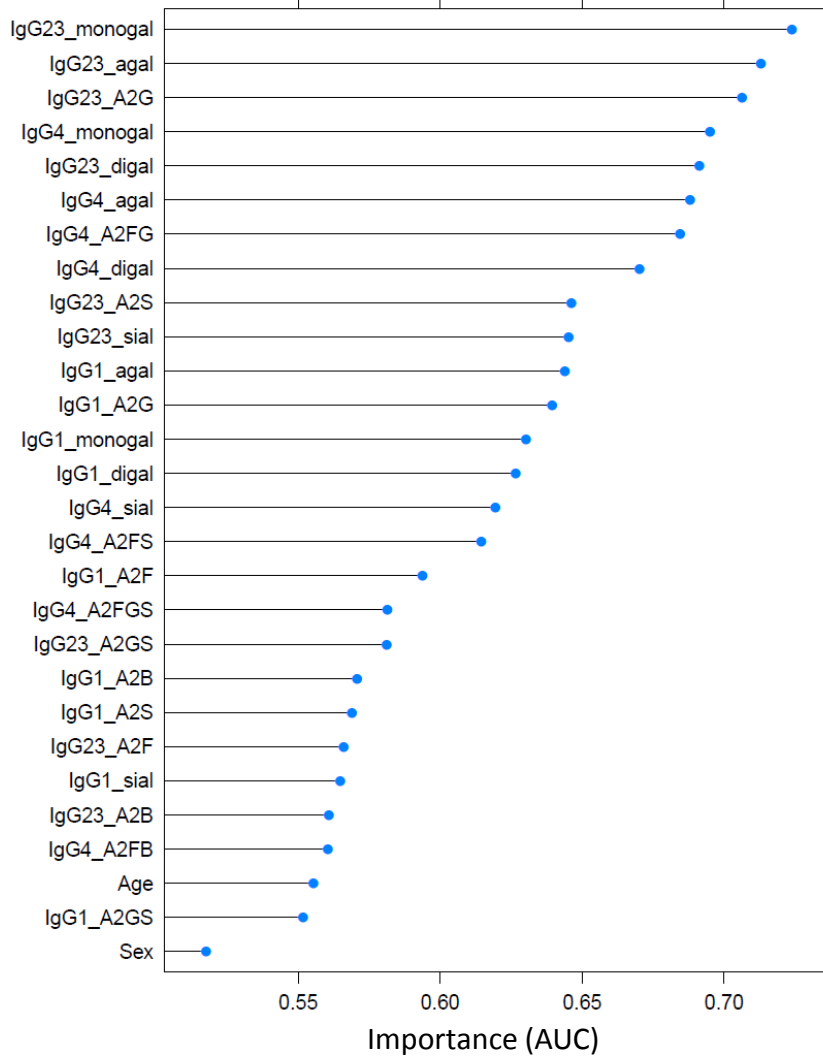

Supplement: NIHMS932728-supplement-6.pdf [file NIHMS932728-supplement-6.pdf]

A

Individual glycoforms

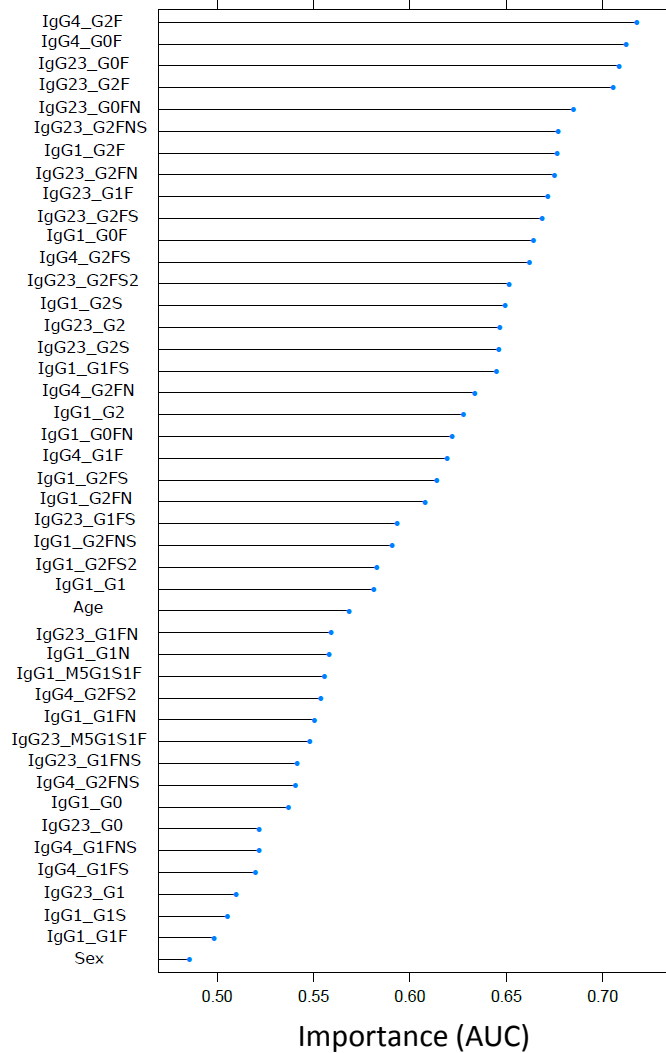

B

Derived traits

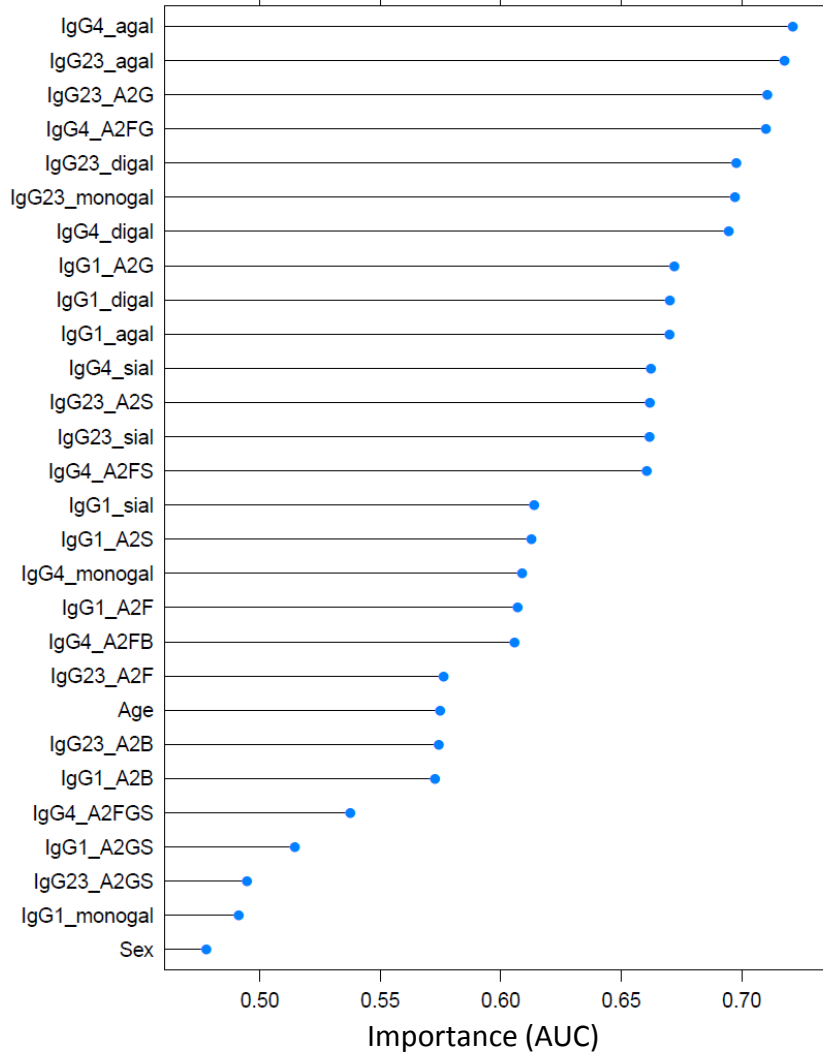

Supplement: NIHMS932728-supplement-7.pdf [file NIHMS932728-supplement-7.pdf]

A

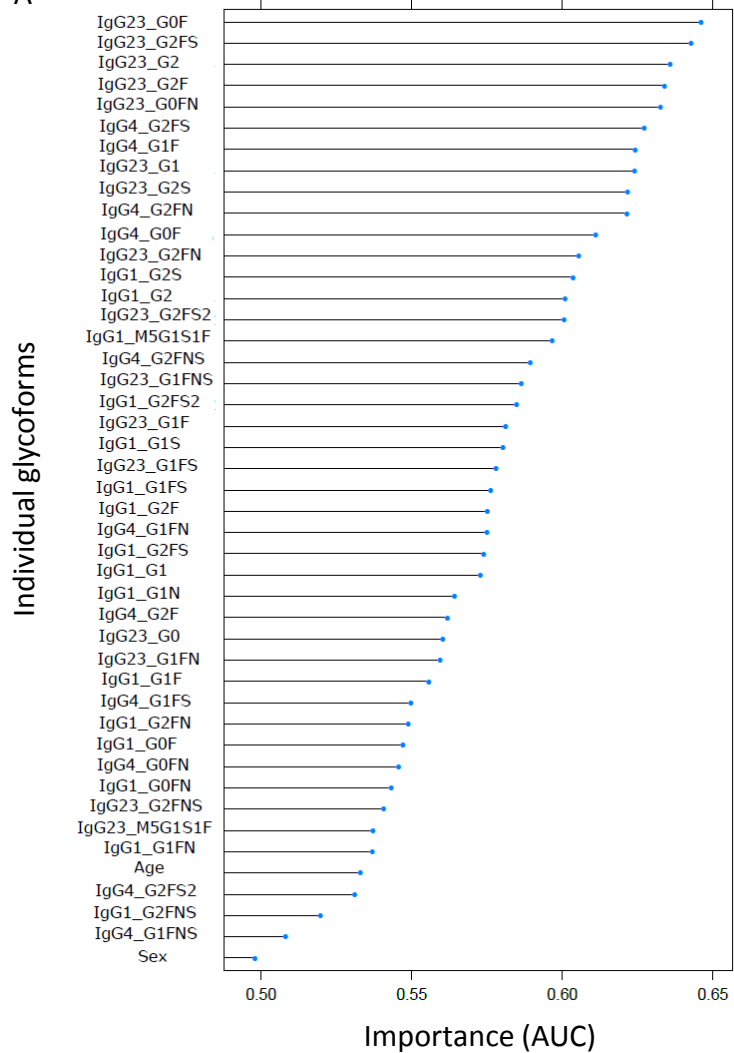

B

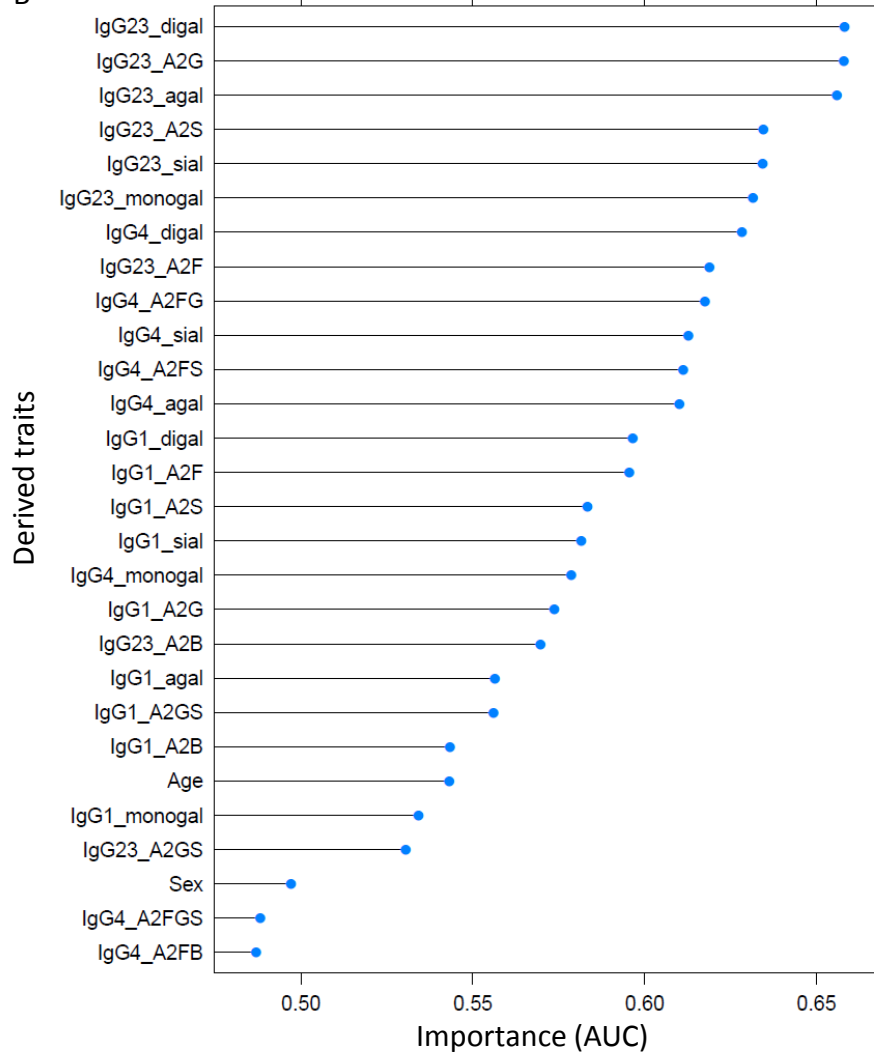

Supplement: NIHMS932728-supplement-8.pdf [file NIHMS932728-supplement-8.pdf]

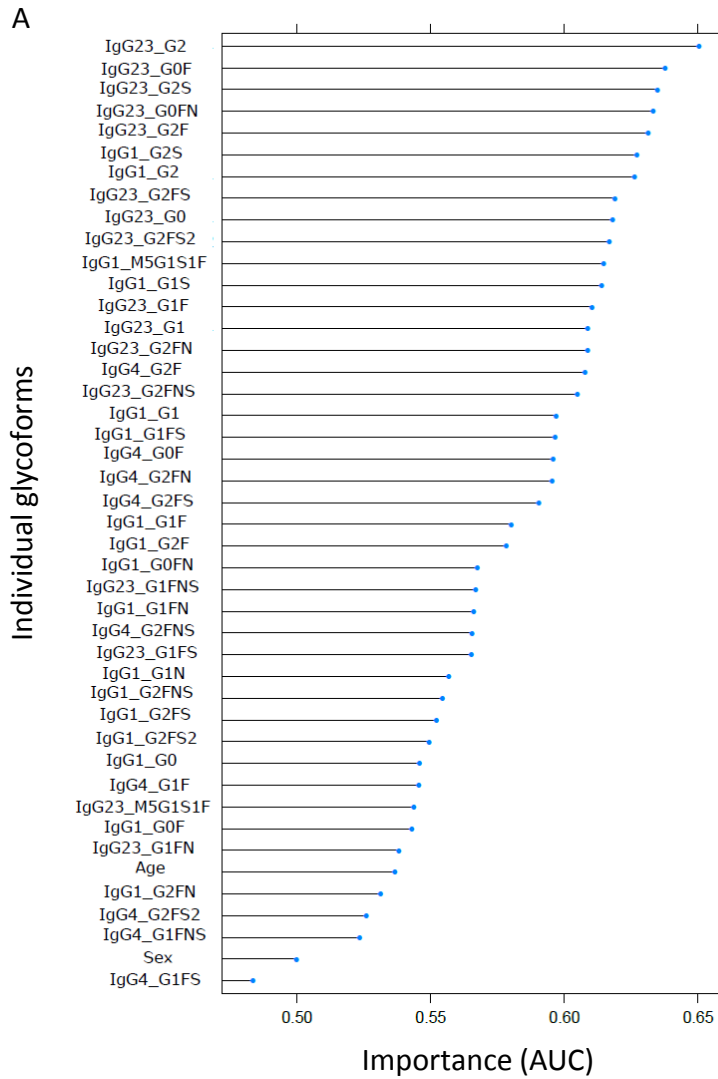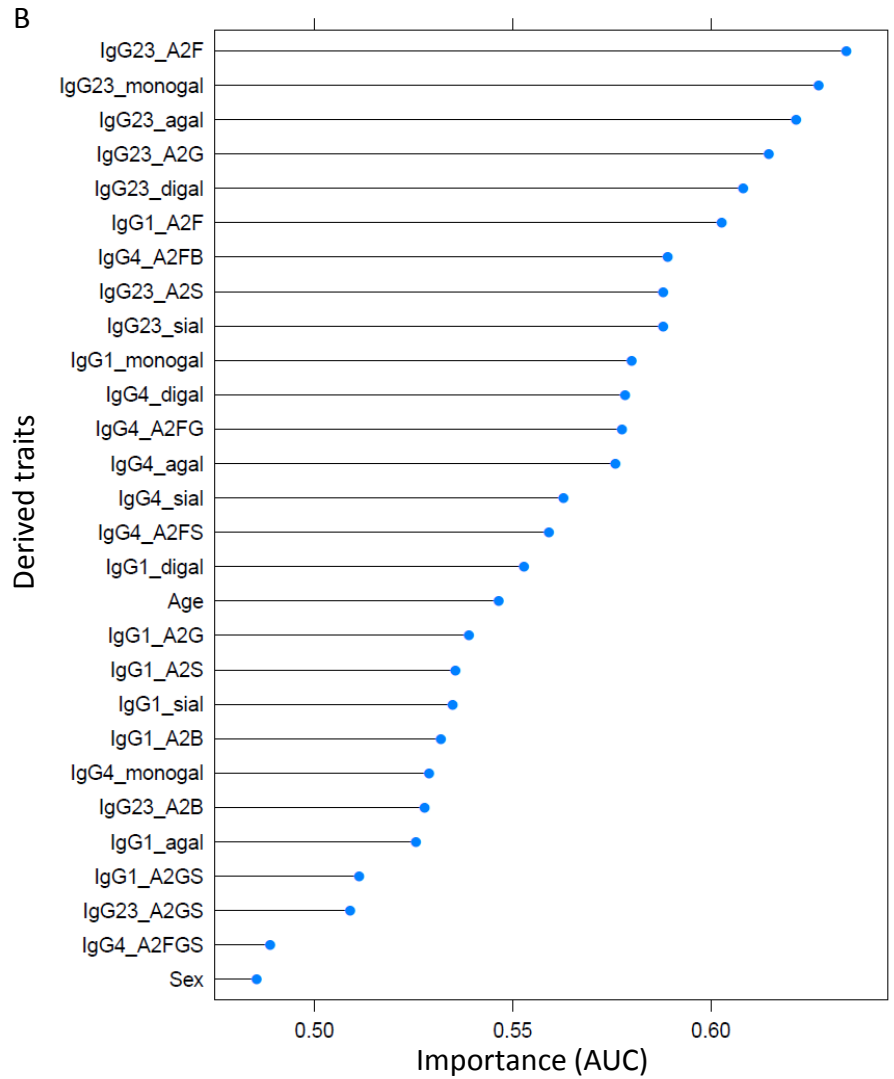

Supplement: NIHMS932728-supplement-9.pdf [file NIHMS932728-supplement-9.pdf]
